# Supplementary material for: Comparison of Robotic and Conventional Unicompartmental Knee Arthroplasty Outcomes in Patients with Osteoarthritis: A Retrospective Cohort Study
Source: MDPI journal article supplement (doi:10.3390/jcm11010220), 2021-12-31
Supplement: s1 [file s1]

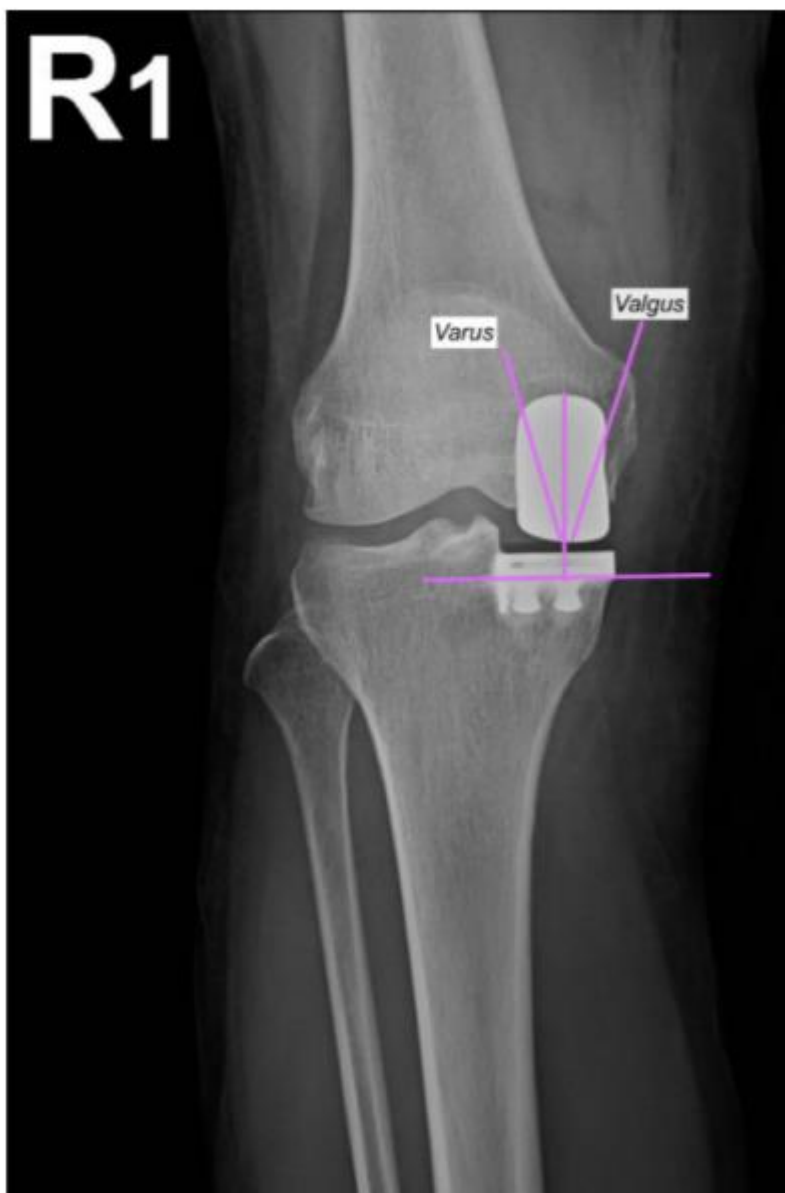

Figure S1. Assessment of the implant alignment grossly based on the radiograph

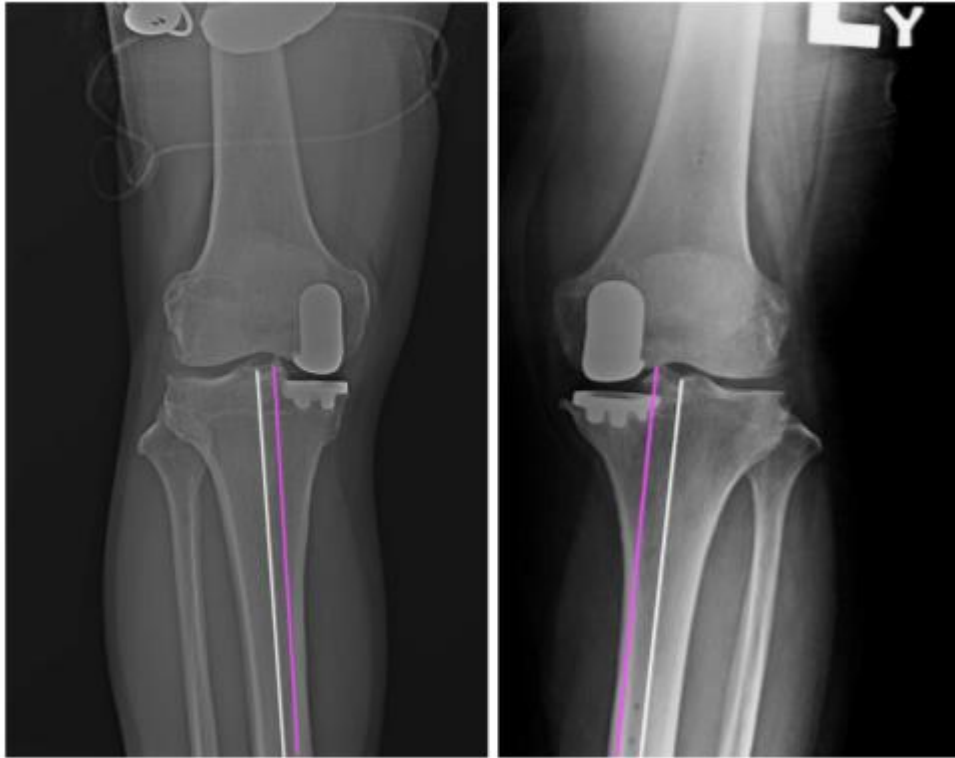

Figure S2. Assessment for the preservation of tibial eminence based on the radiograph

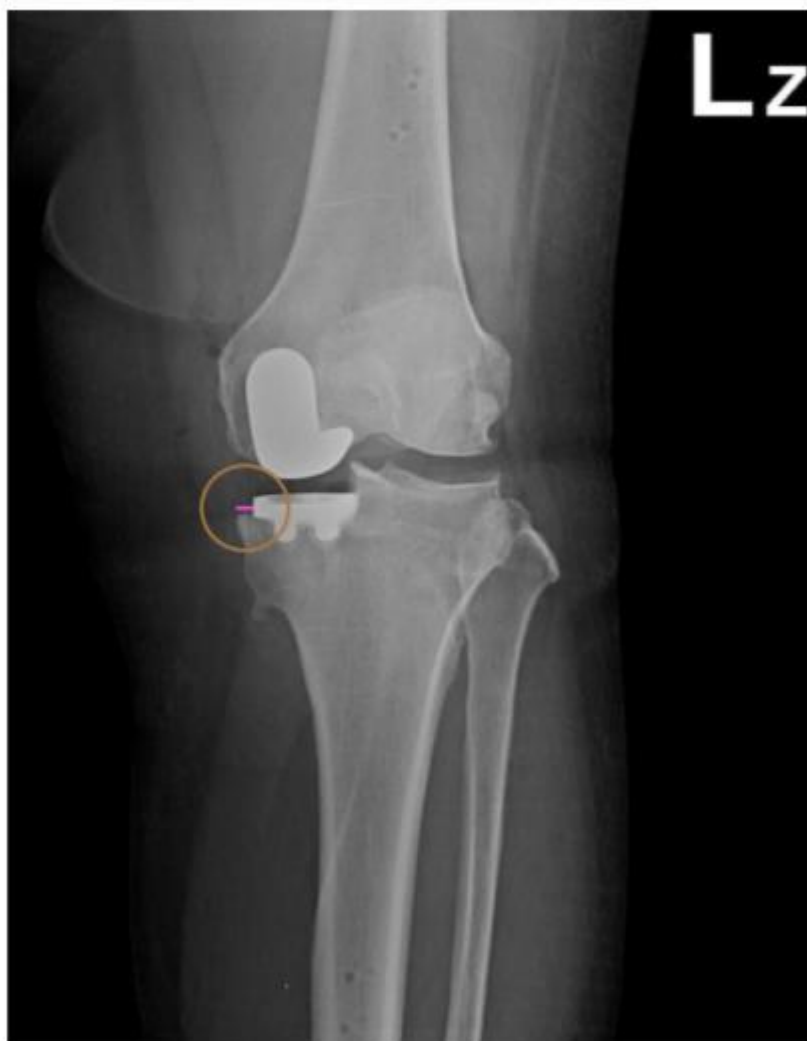

Figure S3. Assessment of the implant positioning as overhang or normal.
